# Supplementary material
Source: publisher figshare collection journal article supplement (https://tandf.figshare.com/articles/dataset/_/12199604)
Supplement: Supplementary file 1 [file 1]

**Supplementary Table 2.** Average release rates at each timepoint for each material, and each metal that had consistent measurements above the detection limit. Measurements consistently below detection limit are indicated by "--". PSS indicates the calculated pseudo steady state leach rate after release has reached asymptote.

| Day | Metal  | Material type                                                   |              |              |              |              |
|-----|--------|-----------------------------------------------------------------|--------------|--------------|--------------|--------------|
|     |        | CAM                                                             | Bronze       | Sheet        | Mesh         | Net          |
|     |        | Leachate concentration (µg cm <sup>-2</sup> day <sup>-1</sup> ) |              |              |              |              |
|     |        | Mean (StDev)                                                    | Mean (StDev) | Mean (StDev) | Mean (StDev) | Mean (StDev) |
| 0   | Copper | 0                                                               | 0            | 0            | 0            | 0            |
| 1   |        | 110 (16)                                                        | 166 (14)     | 163 (37)     | 216 (5)      | 13.2 (2.8)   |
| 8   |        | 101 (12)                                                        | 154 (2)      | 62 (12)      | 206 (31)     | 3.1 (0.4)    |
| 15  |        | 116 (2)                                                         | 153 (6)      | 16 (7)       | 159 (29)     | 1.0 (0.1)    |
| 29  |        | 14 (4)                                                          | 7 (1)        | 6 (2)        | 13 (2)       | 0.9 (0.1)    |
| 43  |        | 14 (5)                                                          | 7 (0)        | 3 (2)        | 5 (1)        | 0.9 (0.5)    |
| 66  |        | 7 (1)                                                           | 4 (1)        | 3 (2)        | 3 (1)        | 0.2 (0.1)    |
| 91  |        | 6 (1)                                                           | 3 (1)        | 2 (1)        | 2 (0)        | 0.1 (0.1)    |
| 183 |        | 4 (2)                                                           | 1 (0)        | 0 (0)        | 1 (0)        | 0.0 (0.1)    |
| 273 |        | 7 (0)                                                           | 3 (2)        | 1 (0)        | 7 (0)        | 0.7 (0.2)    |
| 365 |        | 11 (5)                                                          | 4 (2)        | 2 (0)        | 4 (3)        | 0.7 (0.1)    |
| PSS |        | 6.89                                                            | 2.85         | 1.37         | 3.90         | 0.42         |
| 0   | Nickel | --                                                              | --           | 0            | 0            | --           |
| 1   |        | --                                                              | --           | 34 (9)       | 33 (2)       | --           |
| 8   |        | --                                                              | --           | 6 (1)        | 36 (2)       | --           |
| 15  |        | --                                                              | --           | 2 (0)        | 22 (3)       | --           |
| 29  |        | --                                                              | --           | 0 (0)        | 3 (0)        | --           |
| 43  |        | --                                                              | --           | 0 (0)        | 0 (0)        | --           |
| 66  |        | --                                                              | --           | 0 (0)        | 0 (0)        | --           |
| 91  |        | --                                                              | --           | 0 (0)        | 0 (0)        | --           |
| 183 |        | --                                                              | --           | 0 (0)        | 0 (0)        | --           |

|     |      |         |    |       |       |    |
|-----|------|---------|----|-------|-------|----|
| 273 |      | --      | -- | 0 (0) | 2 (0) | -- |
| 365 |      | --      | -- | 0 (0) | 2 (1) | -- |
| PSS |      | --      | -- | 0.10  | 0.94  | -- |
| 0   | Zinc | 0       | -- | --    | --    | -- |
| 1   |      | 45 (6)  | -- | --    | --    | -- |
| 8   |      | 35 (11) | -- | --    | --    | -- |
| 15  |      | 56 (5)  | -- | --    | --    | -- |
| 29  |      | 9 (2)   | -- | --    | --    | -- |
| 43  |      | 6 (2)   | -- | --    | --    | -- |
| 66  |      | 4 (1)   | -- | --    | --    | -- |
| 91  |      | 5 (0)   | -- | --    | --    | -- |
| 183 |      | 4 (2)   | -- | --    | --    | -- |
| 273 |      | 4 (3)   | -- | --    | --    | -- |
| 365 |      | 6 (4)   | -- | --    | --    | -- |
| PSS |      | 4.59    | -- | --    | --    | -- |
