# Supplementary material
Source: publisher figshare collection journal article supplement (https://tandf.figshare.com/articles/dataset/_/12199604)
Supplement: Supplementary file 3 [file 1]

Archive with 3 entries (3 files):
- GBIF_A_1756267_SupplementaryFigures.pdf
- GBIF_A_1756267_SupplementaryTable1.pdf
- GBIF_A_1756267_SupplementaryTable2.pdf
