# Supplementary material
Source: publisher figshare collection journal article supplement (https://tandf.figshare.com/articles/dataset/_/12199604)
Supplement: Supplementary file 3 [file 1 › GBIF_A_1756267_SupplementaryTable1.pdf]

**Supplementary Table 1.** CH3D model assumptions/parameterization for copper loads and settling velocity in San Diego Bay (SDB) and Sinclair Inlet (SI).

| Model Condition                           | Assumption/Parameterization                                                                                                                                                                                                                                                                  |
|-------------------------------------------|----------------------------------------------------------------------------------------------------------------------------------------------------------------------------------------------------------------------------------------------------------------------------------------------|
| Copper Load                               | Total copper load from fish pen copper: 50 pens, each 167.6 g pen <sup>-1</sup> day <sup>-1</sup> .<br>Total load=2672.8 g day <sup>-1</sup>                                                                                                                                                 |
| Dissolved/Particulate Copper Partitioning | Partitioning coefficient based on field data from Chadwick et al. 2008 of 0.27 l mg <sup>-1</sup>                                                                                                                                                                                            |
| Settling Velocity for Particulate Copper  | Empirical net settling rate 4.3 cm hr <sup>-1</sup> from SDB mouth (Box2) to south SDB (Box24), 2.1 cm hr <sup>-1</sup> at the head of SDB (Box27), and linear decrease from Box24 to Box 26 (per Chadwick et al. 2008).<br><br>Empirical net settling rate of 1 cm hr <sup>-1</sup> for SI. |
| Model output                              | Water column averaged total copper concentrations in µg l <sup>-1</sup>                                                                                                                                                                                                                      |
